# Supplementary material
Source: ML conference proceedings conference paper supplement (https://openreview.net/forum?id=Fkckkr3ya8)
Supplement: supplementary_material [file attachment]

## 609 A Compositional Tasks

### 610 A.1 Multiplication

611 **Data Construction** We exhaustively generate multiplication problems as question-answer pairs  
 612 (e.g., Q: “What is 4 times 32?” A: “128”). We focus on multiplications of two numbers  $x =$   
 613  $(x_1, x_2, \dots, x_k)$  and  $y = (y_1, y_2, \dots, y_k)$  where each number can have up to  $k$  digits, amounting to  
 614  $9 \times 10^{(k-1)}$  combinations per each number. We set  $k$  to 5 in our experiments. Figure 7 showcases  
 615 an example prompt for performing few-shot learning without the inclusion of a scratchpad, while  
 616 Figure 8 demonstrates an example prompt using a scratchpad. Throughout our experimentation,  
 617 we explored various versions of the scratchpad, ranging from verbose and detailed to more concise  
 618 alternatives. Among these variations, the scratchpad version depicted in Figure 8 ultimately produced  
 619 the most favorable outcomes. Listing 1 shows the Python code for solving the task.

To multiply two numbers, start by multiplying the rightmost digit of the multiplicand by each digit of the multiplier, writing down the products and carrying over any remainders. Repeat this process for each digit of the multiplicand, and then add up all the partial products to obtain the final result.

Questions: what's 22 times 2? Answer 44.

Figure 7: Example prompt for the multiplication task used for the few-shot setting.

Question: What is 35 times 90?

Scratchpad: Let's perform the multiplication step by step:

Let's multiply 35 by the digit in the ones place of 90, which is 0.

1. Multiply 0 by the digit in the ones place of 35, which is 5. This gives  $5 \times 0 = 0$ . Write down the result 0.
2. Multiply 0 by the digit in the tens place of 35, which is 3. This gives  $3 \times 0 = 0$ . Write down the result 0.
3. The partial product for this step is A=0 which is the concatenation of the digits we found in each step.

Now, let's multiply 35 by the digit in the tens place of 90, which is 9.

4. Multiply 9 by the digit in the ones place of 35, which is 5. This gives  $5 \times 9 = 45$ . Write down the result 5 and carry over the 4 to the next step.
5. Multiply 9 by the digit in the tens place of 35, which is 3. Add the carryover from the previous step to account for this. This gives  $(3 \times 9) + 4 = 31$ . Write down the result 31.
6. The partial product for this step is B=315 which is the concatenation of the digits we found in each step.

Now, let's sum the 2 partial products A and B, and take into account the position of each digit: A=0 (from multiplication by 0) and B=315 (from multiplication by 9 but shifted one place to the left, so it becomes 3150). The final answer is  $0 \times 1 + 315 \times 10 = 0 + 3150 = 3150$ .

Figure 8: A sample scratchpad for the multiplication task.

```
620 1 def multiply(x, y):
621 2     summands = [0] * len(y)
622 3     for i in range(len(y) - 1, -1, -1):
```

```

623 4     digits = [0] * len(x)
624 5     carry = 0
625 6     for j in range(len(x) - 1, -1, -1):
626 7         t = x[j] * y[i]
627 8         t += carry
628 9         carry = t // 10
629 10        digits[j] = t % 10
630 11        digits.insert(0, carry)
631 12        summands[i] = sum(digits[-k] * (10 ** (k - 1)) for k in range
632 (1, len(digits) + 1))
633 13
634 14    product = sum(summands[-i] * (10 ** (i - 1)) for i in range(1, len
635 (y) + 1))
636 15    return product

```

Listing 1: Example Python code for solving the multiplication task.

## 637 A.2 Einstein’s Puzzle

638 **Data Construction** In our experiments, we initially establish a set of properties, such as Color, PhoneModel, Pet, and so forth, along with their corresponding values expressed in natural language templates (e.g., “The house has a red color.”). We then devise a fundamental and straightforward set of clue types: 1) ‘found\_at’, e.g., “Alice lives in House 2”, 2) ‘same\_house’, e.g., “The person who is a cat lover lives in the house that has a red color.”, 3) ‘direct\_left’, e.g., “The person who has a dog as a pet lives to the left of the person who lives in a red house.”, and 4) ‘besides’, e.g., “The person who has a dog as a pet and the person who has a red house live next to each other.” In addition, we also set up harder clue types such as ‘not\_at’, ‘left\_of’ (not necessarily directly left of), ‘two\_house\_between’, etc. which are only used in auxiliary experiments.

647 The solution to the puzzle is a matrix of size  $K \times M$ , where  $K$  represents the number of houses and  $M$  the number of attributes. During the puzzle generation, the  $M$  properties are randomly selected from the candidate pool, followed by the random sampling of  $K$  values for each property. The sampled values are then randomly permuted and assigned within the table to create the solution. It is important to note that we ensure one of the sampled properties is ‘Name’ to enhance the readability and comprehensibility of the puzzles. To construct the clues, we initially over-generate all valid clues based on the solution and subsequently remove redundant clues at random until we obtain a set with a

### General Unique Rules

There are 3 houses (numbered 1 on the left, 3 on the right). Each has a different person in them. They have different characteristics:

- Each person has a unique name: **peter, eric, arnold**
- People have different favorite sports: **soccer, tennis, basketball**
- People own different car models: **tesla, ford, camry**

>UniqueValues<

### Clues

1. The person who owns a **Ford** is the person who loves **tennis**.
2. **Arnold** is in the third house.
3. The person who owns a **Camry** is directly left of the person who owns a **Ford**.
4. **Eric** is the person who owns a **Camry**.
5. The person who loves **basketball** is **Eric**.
6. The person who loves **tennis** and the person who loves **soccer** are next to each other.

### Reasoning Path Generation

#### Algorithm 1 Puzzle Solver

Input: Clues

Output: Reasoning path

```

1: function PUZZLESOLVER(Clues)
2:   Path ← []
3:   LeftClues ← clues
4:   while |LeftClues| ≠ 0 do
5:     for i=1 to |LeftClues| do
6:       CandidateClues = (LeftClues[i])
7:       for clue in CandidateClues do
8:         if solve any cell then
9:           LeftClues.remove(clue)
10:          Path.append(clue)
11:   return Path

```

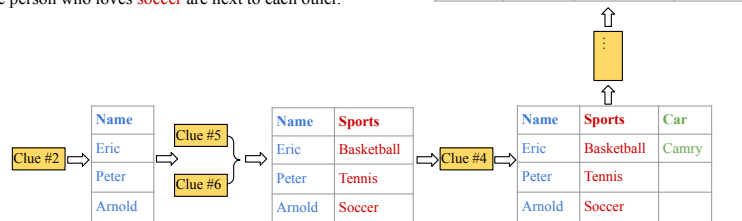

Figure 9: A sample of the puzzle task and the reasoning path to reach a solution.

This is a logic puzzle. There are 3 houses (numbered 1 on the left, 3 on the right). Each has a different person in them. They have different characteristics:

- Each person has a unique name: peter, eric, arnold
- People have different favorite sports: soccer, tennis, basketball
- People own different car models: tesla model 3, ford f150, toyota camry

1. The person who owns a Ford F-150 is the person who loves tennis.
2. Arnold is in the third house.
3. The person who owns a Toyota Camry is directly left of the person who owns a Ford F-150.
4. Eric is the person who owns a Toyota Camry.
5. The person who loves basketball is Eric.
6. The person who loves tennis and the person who loves soccer are next to each other.

Let's think step by step. Please first briefly talk about your reasoning and show your final solution by filling the blanks in the below table.

\$ House: \_\_\_ \$ Name: \_\_\_ \$ Sports: \_\_\_ \$ Car: \_\_\_  
 \$ House: \_\_\_ \$ Name: \_\_\_ \$ Sports: \_\_\_ \$ Car: \_\_\_  
 \$ House: \_\_\_ \$ Name: \_\_\_ \$ Sports: \_\_\_ \$ Car: \_\_\_

Reasoning:

Step 1: First apply clue <Arnold is in the third house.> We know that The Name in house 3 is arnold.

Step 2: Then combine clues: <The person who loves tennis and the person who loves soccer are next to each other.> <The person who loves basketball is Eric.> Unique Values Rules and the fixed table structure. We know that The Name in house 1 is eric. The FavoriteSport in house 1 is basketball. The Name in house 2 is peter.

Step 3: Then apply clue <Eric is the person who owns a Toyota Camry.> We know that The CarModel in house 1 is toyota camry.

Step 4: Then apply clue <The person who owns a Toyota Camry is directly left of the person who owns a Ford F-150.> and Unique Values We know that The CarModel in house 2 is ford f150. The CarModel in house 3 is tesla model 3.

Step 5: Then apply clue <The person who owns a Ford F-150 is the person who loves tennis.> and Unique Values We know that The FavoriteSport in house 2 is tennis. The FavoriteSport in house 3 is soccer.

The puzzle is solved.

Final solution:

|             |                 |                       |               |
|-------------|-----------------|-----------------------|---------------|
| \$ House: 1 | \$ Name: Eric   | \$ Sports: Basketball | \$ Car: Camry |
| \$ House: 2 | \$ Name: Peter  | \$ Sports: Tennis     | \$ Car: Ford  |
| \$ House: 3 | \$ Name: Arnold | \$ Sports: Soccer     | \$ Car: Tesla |

Figure 10: A sample scratchpad for the puzzle task.

654 unique solution, as previously sampled. This process ensures a coherent and engaging puzzle-solving  
 655 experience. Refer to Figure 9 for an example.

656 **Graph Construction Algorithm** To solve the complex compositional reasoning process for a  
 657 logical grid puzzle, we use existing puzzle solvers [18] to generate the computation graph. It follows  
 658 the basic greedy principle of applying the minimum number of rules to solve any cell, i.e., if using  
 659 only one rule to solve any given cell, then apply this rule. This algorithm iterates through all clues in  
 660 the clue set until one or a set of clue combinations can solve any cell in the table. While it may not be  
 661 the most efficient way to solve the puzzle, it provides models with explicit scratchpad verbalization  
 662 through an intuitive computation graph. Refer to Figure 9 for the pseudo-code of the process, and  
 663 Figure 10 for a scratchpad example.

### 664 A.3 Dynamic Programming Problem

#### 665 A.3.1 Solution to this problem

666 Let  $a = [a_1, \dots, a_n]$  be an input. Let  $dp_i$  be the maximum sum of a subsequence that does not  
 667 include adjacent elements, when considering only the elements of the input from the  $i$ -th position  
 668 onwards.

669 Trivially,  $dp_n = \max(a_n, 0)$  since we only want to choose a number if it is non-negative. Moreover,  
 670  $dp_{n-1} = \max(a_n, a_{n-1}, 0)$  since we cannot choose adjacent numbers.

671 For any given  $dp_i$  with  $i \leq n - 2$ , we can express it in terms of  $dp_{i+1}$  and  $dp_{i+2}$ . Concretely, the  
 672 maximum sum of a subsequence starting at position  $i$  may or may not include the element in the  $i$ -th  
 673 position,  $a_i$ . If the subsequence includes  $a_i$ , then the maximum sum is  $a_i + dp_{i+2}$ , since using  $a_i$   
 674 blocks us from using the next element. If the subsequence does not include  $a_i$ , then its sum is  $dp_{i+1}$ .  
 675 Moreover, the answer may never be less than zero, because otherwise we would select the empty  
 676 sequence<sup>3</sup>. In summary,

$$dp_i = \max(dp_{i+1}, a_i + dp_{i+2}, 0)$$

677 We now have a recursion with its base cases  $dp_n = \max(a_n, 0)$  and  $dp_{n-1} = \max(a_n, a_{n-1}, 0)$ , and  
 678 we can therefore compute all values in  $O(n)$ . It now only rests to reconstruct the lexicographically  
 679 smallest subsequence that maximizes the desired sum, based solely on the computed  $dp$  values.

680 Starting from  $dp_1$  and iterating sequentially through  $dp_{n-2}$ , we choose an item if and only if  
 681  $dp_i = a_i + dp_{i+2}$  (that is, the maximum sum comes from choosing the current element) and we have  
 682 not chosen the previous element. This helps disambiguate cases where choosing or not choosing  
 683  $a_i$  yields the same sum, but possibly only one of those will not incur in choosing adjacent numbers.  
 684 Similarly, for positions  $i = n - 1$  and  $i = n$  we choose the element if  $dp_i = a_i$  (that is, choosing the  
 685 element yields the maximum sum) and we have not chosen the immediately previous element. See an  
 686 example Python solution in [2](#).

Given a sequence of integers, find a subsequence with the highest sum, such that no two numbers in the subsequence are adjacent in the original sequence.

Output a list with "1" for chosen numbers and "2" for unchosen ones. If multiple solutions exist, select the lexicographically smallest. input = [3, 2, 1, 5, 2].

Figure 11: Example prompt for the DP task, used for zero-shot and few-shot settings.

```

687 1 def maximum_sum_nonadjacent_subsequence(arr):
688 2
689 3     N = len(arr)
690 4     dp = [0 for _ in range(N)]
691 5
692 6     dp[N - 1] = max(arr[N - 1], 0)
693 7     dp[N - 2] = max(max(arr[N - 1], arr[N - 2]), 0)
694 8
695 9     for i in range(N - 3, -1, -1):
696 10         dp[i] = max(max(dp[i + 1], arr[i] + dp[i + 2]), 0)
697 11
698 12     # reconstruct the answer with a fixed-size graph
699 13     result = []
700 14     can_use_next_item = True
701 15
702 16     for i in range(N - 2):
703 17         if dp[i] == arr[i] + dp[i + 2] and can_use_next_item:
704 18             result.append(1)
705 19             can_use_next_item = False
706 20         else:

```

<sup>3</sup>We don't need to explicitly check for this since  $dp_n \geq 0$ . However, we include the condition to ease the scratchpad logic.

```

70721         result.append(2)
70822         can_use_next_item = True
70923
71024     if dp[N - 2] == arr[N - 2] and can_use_next_item:
71125         result.append(1)
71226         can_use_next_item = False
71327     else:
71428         result.append(2)
71529         can_use_next_item = True
71630
71731     if dp[N - 1] == arr[N - 1] and can_use_next_item:
71832         result.append(1)
71933     else:
72034         result.append(2)
72135
72236     return result

```

Listing 2: Example Python code for solving the DP task. We chose this implementation because the computation graph has always the same topology for any given input length.

Question: Let's solve input = [3, 2, 1, 5, 2].

Scratchpad:  $dp[4] = \max(\text{input}[4], 0) = \max(2, 0) = 2$   
 $dp[3] = \max(\text{input}[3], \text{input}[4], 0) = \max(5, 2, 0) = 5$   
 $dp[2] = \max(dp[3], \text{input}[2] + dp[4], 0) = \max(5, 1 + 2, 0) = 5$   
 $dp[1] = \max(dp[2], \text{input}[1] + dp[3], 0) = \max(5, 2 + 5, 0) = 7$   
 $dp[0] = \max(dp[1], \text{input}[0] + dp[2], 0) = \max(7, 3 + 5, 0) = 8$

Finally, we reconstruct the lexicographically smallest subsequence that fulfills the task objective by selecting numbers as follows. We store the result on a list named "output".

Let  $\text{can\_use\_next\_item} = \text{True}$ .  
 Since  $dp[0] == \text{input}[0] + dp[2]$  ( $8 == 3 + 5$ ) and  $\text{can\_use\_next\_item} == \text{True}$ , we store  $\text{output}[0] = 1$ . We update  $\text{can\_use\_next\_item} = \text{False}$ .  
 Since  $dp[1] != \text{input}[1] + dp[3]$  ( $7 != 2 + 5$ ) or  $\text{can\_use\_next\_item} == \text{False}$ , we store  $\text{output}[1] = 2$ . We update  $\text{can\_use\_next\_item} = \text{True}$ .  
 Since  $dp[2] != \text{input}[2] + dp[4]$  ( $5 != 1 + 2$ ) or  $\text{can\_use\_next\_item} == \text{False}$ , we store  $\text{output}[2] = 2$ . We update  $\text{can\_use\_next\_item} = \text{True}$ .  
 Since  $dp[3] == \text{input}[3]$  ( $5 == 5$ ) and  $\text{can\_use\_next\_item} == \text{True}$ , we store  $\text{output}[3] = 1$ . We update  $\text{can\_use\_next\_item} = \text{False}$ .  
 Since  $dp[4] != \text{input}[4]$  ( $2 != 2$ ) or  $\text{can\_use\_next\_item} == \text{False}$ , we store  $\text{output}[4] = 2$ .

Reconstructing all together,  $\text{output}=[1, 2, 2, 1, 2]$ .

Figure 12: A sample scratchpad for the DP task used for fine-tuning with few-shot settings.

**Data Construction** We exhaustively generate data for this DP task. For question-answer setting, we include a thorough explanation of the task before asking to generate a solution (see Figure 11). We use all lists up to 5 elements as training, and we consider only lists where elements are in the range  $[-5, 5]$  (giving a total of  $11^n$  lists for an input list of size  $n$ ). For out-of-domain evaluation, we use lists of sizes 6 to 10 inclusive. Example scratchpads and zero-shot prompts are shown in Figure 12 and 11 respectively. The scratchpad is generated automatically through templates. We considered five exemplars for the few-shot setup.

## B Experimental Setups & Empirical Results

### B.1 Models

For our experiments, we evaluate the performance of 6 LLMs: GPT4 (gpt-4) [42], ChatGPT (GPT3.5-turbo) [41], GPT3 (text-davinci-003) [8], FlanT5 [13] and LLaMa [58]. The evaluations were conducted from January 2023 to May 2023 using the OpenAI API. We perform fine-tuning on GPT3 (text-davinci-003) for the three tasks, observing faster convergence when training on question-scratchpad pairs rather than question-answer pairs. For question-answer pairs fine-tuning, we train separately the model for {12, 12, 4} epochs for multiplication, puzzle, and DP respectively, saving the best model based on the validation set. Regarding training on question-scratchpad pairs, we train the model for {4, 8, 2} epochs for multiplication, puzzle, and DP. The batch size is set to approximately 0.2% of the number of examples in the training set. Generally, we observe that larger batch sizes tend to yield better results for larger datasets. For the learning rate multiplier, we experiment with values ranging from 0.02 to 0.2 to determine the optimal setting for achieving the best results and chose 0.2. During inference, we set nucleus sampling  $p$  to 0.7 and temperature to 1. For each task, we evaluate the performance of each model on 500 test examples.

### B.2 Limits of Transformers in Zero- and Few-shot Settings

Figure 14, Figure 16 and Figure 18 show the zero-shot performance of GPT4, ChatGPT, LLaMA and FlanT5 on the three tasks. Overall, there is a notable decline in performance as the task complexity increases (measured by graph parallelism for multiplication and DP, and propagation steps for puzzles as shown in Figure 13). The few-shot performance with question-answer pairs results in minimal improvement over the zero-shot setting as depicted in Figure 15 and Figure 18 for the multiplication and DP tasks. In contrast, the few-shot setting did not lead to any improvement in the puzzle task.

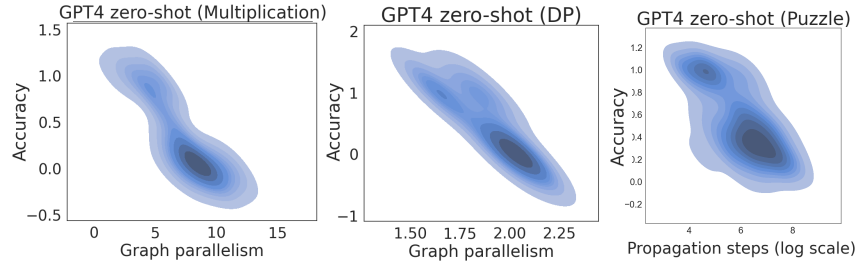

Figure 13: Graph parallelism vs accuracy. The accuracy decreases as the complexity increases.

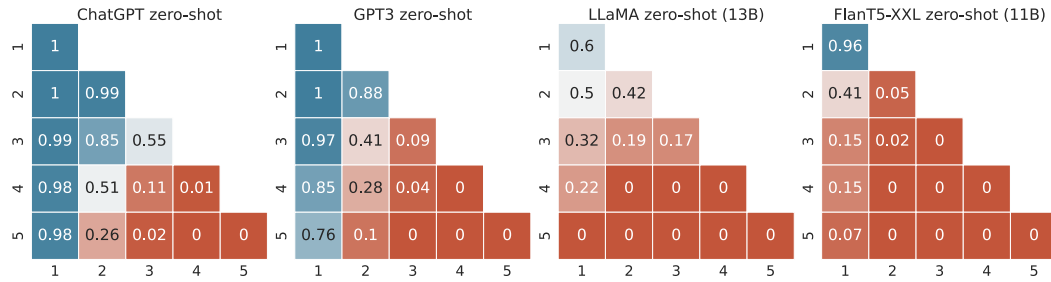

Figure 14: **Zero-shot accuracy.** Performance of ChatGPT, GPT3, LLaMA and FlanT5 on the **multiplication** task.

### B.3 Limits of Transformers with question-answer Training

Figure 17 and Figure 19 show the performance of GPT3 finetuned on question-answer pairs. The model was trained on various splits, considering the problem size, depth, and width of the computation graph. Specifically, for the multiplication task, the model was fine-tuned on a range of multiplication problems, spanning from 1-digit by 1-digit multiplication to 4-digit by 2-digit multiplication amounting to 1.8M pairs. As for the puzzle task, the model was fine-tuned on puzzles of sizes ranging from 2x2 to 4x4 resulting in a total of 142k pairs. Additionally, for the DP task, the model was fine-tuned on problems with a sequence length of 5 resulting in 41K pairs. In an additional setup, we divided

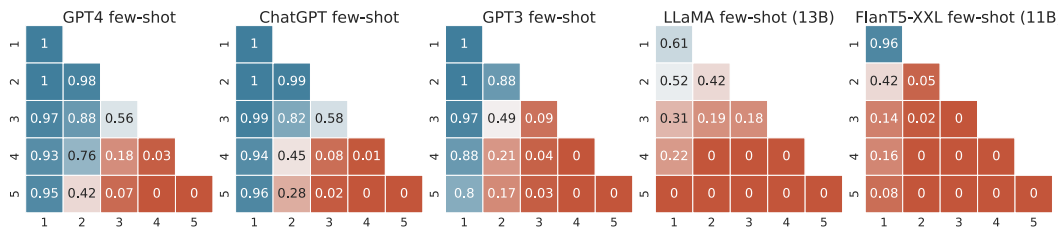

Figure 15: **Few-shot accuracy** with **question-answer** pairs. Performance of GPT4, ChatGPT, GPT3, LLaMA and FlanT5 on the **multiplication** task.

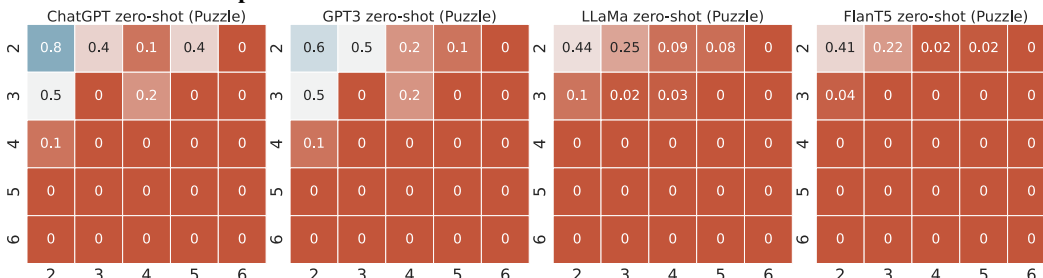

Figure 16: **Zero-shot accuracy**. Performance of ChatGPT, GPT3, LLaMA and FlanT5 on the **puzzle** task. Few-shot performance led to worse performance.

those datasets based on the depth and width of the computation graph for all the tasks and finetuned on different splits. The results indicate a lack of generalization for out-of-domain (OOD) examples while showcasing near-perfect performance for in-domain examples.

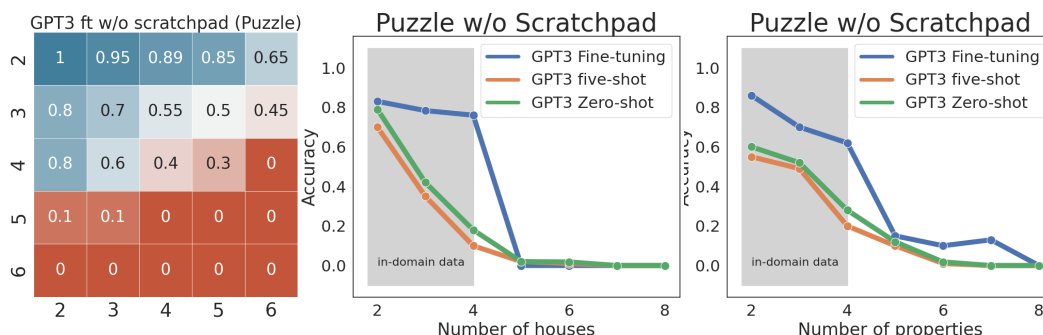

Figure 17: GPT3 finetuned on the puzzle task using **question-answer** pairs. The training data consisted of puzzles of size 4x4, and the model was subsequently evaluated on larger puzzle sizes for OOD testing.

**GPT3 finetuning cost** We will discuss here the approximate cost of fine-tuning GPT3 for the multiplication task. When fine-tuning with question-answer pairs, each example typically consists of around 20 tokens, and 250 tokens for question-scratchpad pairs. The cost for utilizing the text-davinci-003 model amounts to \$0.02 (USD) per 1,000 tokens. With this particular setup, the total number of training examples required for multiplication up to 5 digits by 5 digits reaches an astonishing figure of approximately 9.1 billion examples. Should we choose to fine-tune GPT3 for 4 epochs on question-answer pairs, the cost would amount to \$12 million and \$700 million for question-scratchpad training. For a more comprehensive breakdown of the cost per problem size, please refer to Table 11.

#### B.4 Limits of Transformers with Explicit Scratchpad Training

Figure 21, 22, 20 show the performance of GPT3 finetuned on different splits of the tasks using question-scratchpad pairs. Specifically, for the multiplica-



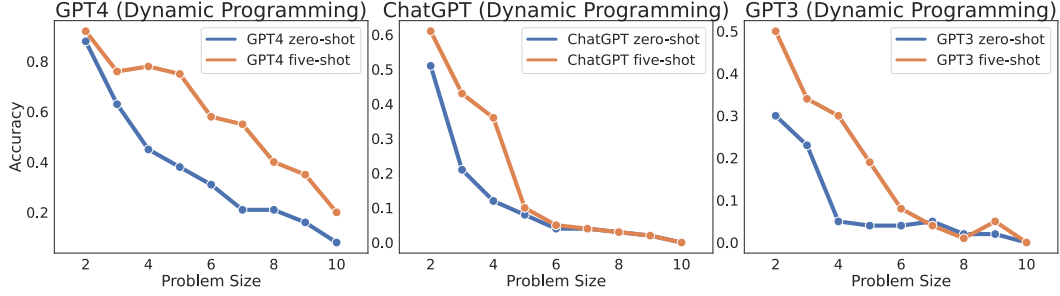

Figure 18: **Zero-shot** and **Few-shot accuracy** using **question-answer** pairs. Performance of GPT4, ChatGPT, and GPT3 on the **dynamic programming** task. LLaMA and FlanT5 results are near zero for all problem sizes.

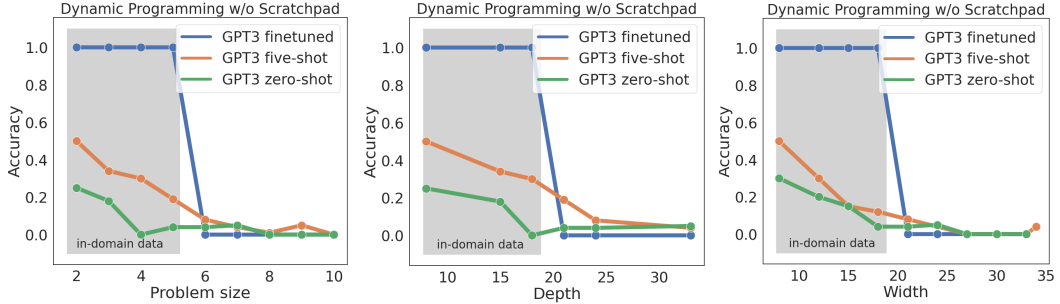

Figure 19: GPT3 finetuned on the **dynamic programming** task using **question-answer** pairs. We consider different data splits: problem size, depth, and width of the graph. Specifically, the model was trained with a problem size of 5, and the graph’s depth and width were set to 18.

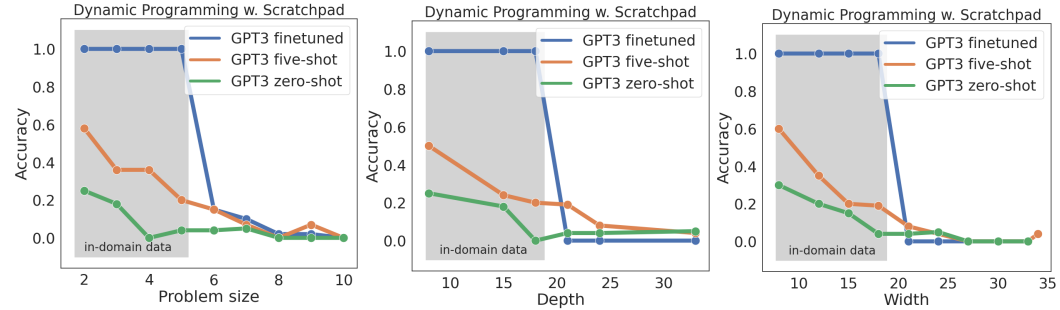

Figure 20: GPT3 finetuned on the **dynamic programming** task using **question-scratchpad** pairs. We consider different data splits: problem size, depth, and width of the graph. Specifically, the model was trained with a problem size of 5, and the graph’s depth and width were set to 18.

775 tion task, the model was fine-tuned on a range of multiplication problems, span-  
 776 ning from 1-digit by 1-digit multiplication to 3-digit by 2-digit multiplication.  
 777

778 As for the puzzle task, the model was fine-tuned on  
 779 puzzles of sizes ranging from 2x2 to 4x4. Addition-  
 780 ally, for the DP task, the model was fine-tuned on  
 781 problems with a sequence length of 5. Furthermore,  
 782 different data splits were considered, including varia-  
 783 tions based on the number of hours, number of prop-  
 784 erties, depth and width of the graph, and the number  
 785 of digits in the multiplication output. On all tasks,  
 786 we can see that the model fails to generalize to OOD  
 787 data while achieving perfect accuracy on in-domain  
 788 data, indicating that it cannot learn the underlying  
 789 computational rules.

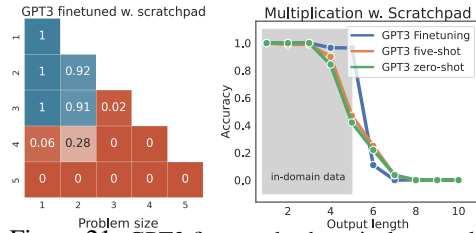

Figure 21: GPT3 finetuned exhaustively on task-specific data up to a certain problem size. In particular, we train on examples up to 3-digit by 2-digit multiplication (left) and on examples that have up to 5 digits in the output response (right). The **blue** region represents the in-distribution examples and the **red** region refers to OOD examples.



| Problem size | # examples | GPT3 Cost          |                 |
|--------------|------------|--------------------|-----------------|
|              |            | without scratchpad | with scratchpad |
| 1 x 1        | 81         | \$0.12             | \$7.44          |
| 2 x 1        | 810        | \$1.28             | \$74.4          |
| 2 x 2        | 8100       | \$12.96            | \$744           |
| 3 x 1        | 8100       | \$12.96            | \$744           |
| 3 x 2        | 81000      | \$129.6            | \$7440          |
| 3 x 3        | 810000     | \$1296             | \$74,404        |
| 4 x 1        | 81000      | \$129.6            | \$7440          |
| 4 x 2        | 810000     | \$1296             | \$74,404        |
| 4 x 3        | 8100000    | \$12,960           | \$744,040       |
| 4 x 4        | 81000000   | \$129,600          | \$7,440,400     |
| 5 x 1        | 810000     | \$1296             | \$74,404        |
| 5 x 2        | 8100000    | \$12,960           | \$744,040       |
| 5 x 3        | 81000000   | \$129,600          | \$7,440,400     |
| 5 x 4        | 810000000  | \$1,296,000        | \$70,440,400    |
| 5 x 5        | 8100000000 | \$12,960,000       | \$700,440,400   |

Table 1: Finetuning cost of GPT3 model on the multiplication data.

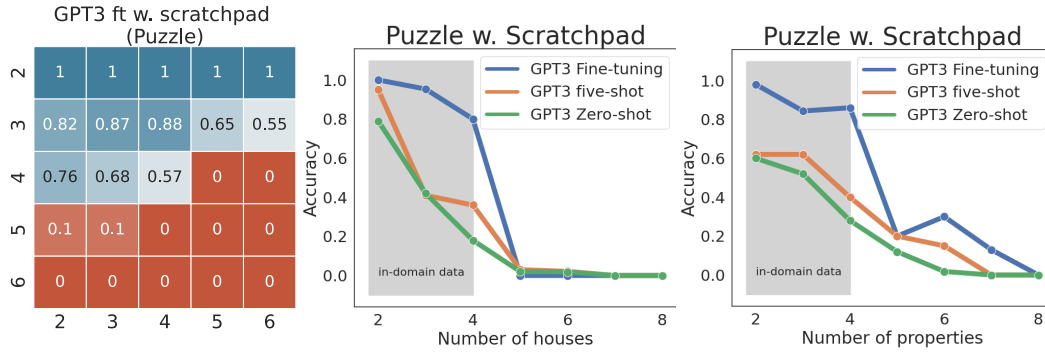

Figure 22: GPT3 finetuned on the puzzle task using **question-scratchpad** pairs. The training data consisted of puzzles of size 4x4, and the model was subsequently evaluated on larger puzzle sizes for OOD testing.

791 **C Surface Patterns**

792 **C.1 Relative Information Gain Predictions for**  
793 **Multiplication**

| Input variable    | Output variable | Relative Information Gain |       |       |       |
|-------------------|-----------------|---------------------------|-------|-------|-------|
|                   |                 | 2x2                       | 3x3   | 4x4   | 5x5   |
| $x_n$             | $z_{2n}$        | 0.223                     | 0.223 | 0.223 | 0.223 |
| $y_n$             | $z_{2n}$        | 0.223                     | 0.223 | 0.223 | 0.223 |
| $x_1$             | $z_1$           | 0.198                     | 0.199 | 0.199 | 0.199 |
| $y_1$             | $z_1$           | 0.198                     | 0.199 | 0.199 | 0.199 |
| $x_n y_n$         | $z_{2n}$        | 1.000                     | 1.000 | 1.000 | 1.000 |
| $x_{n-1} x_n$     | $z_{2n}$        | 0.223                     | 0.223 | 0.223 | 0.223 |
| $y_{n-1} y_n$     | $z_{2n}$        | 0.223                     | 0.223 | 0.223 | 0.223 |
| $x_n y_n$         | $z_{2n-1}$      | 0.110                     | 0.101 | 0.101 | 0.101 |
| $y_{n-1} y_n$     | $z_{2n-1}$      | 0.032                     | 0.036 | 0.036 | 0.036 |
| $x_{n-1} x_n$     | $z_{2n-1}$      | 0.032                     | 0.036 | 0.036 | 0.036 |
| $x_{n-1} y_{n-1}$ | $z_{2n-1}$      | 0.018                     | 0.025 | 0.025 | 0.025 |
| $x_1 y_1$         | $z_2$           | 0.099                     | 0.088 | 0.088 | 0.088 |
| $x_2 y_2$         | $z_2$           | 0.025                     | 0.016 | 0.016 | 0.016 |
| $x_1 y_1$         | $z_1$           | 0.788                     | 0.792 | 0.793 | 0.793 |
| $y_1 y_2$         | $z_1$           | 0.213                     | 0.211 | 0.211 | 0.211 |
| $x_1 x_2$         | $z_1$           | 0.213                     | 0.211 | 0.211 | 0.211 |

Table 2: **Highest Relative Information Gain Elements and Pairs of Elements**, for multiplications between  $x = (x_1, \dots, x_n)$  and  $y = (y_1, \dots, y_n)$ , with  $2 \leq n \leq 5$ . We define  $z := x \cdot y$ , which will always have size  $2n$  (with possibly a leading zero).  $z_{2n}$  denotes the least-significant digit of  $z$ , and  $z_1$  denotes the left-most digit. Only (input, output) pairs above 0.01 are shown. Note that since multiplication is commutative, several pairs of input variables (e.g.  $a_0$  and  $b_0$ ) exhibit the same relative information gain.

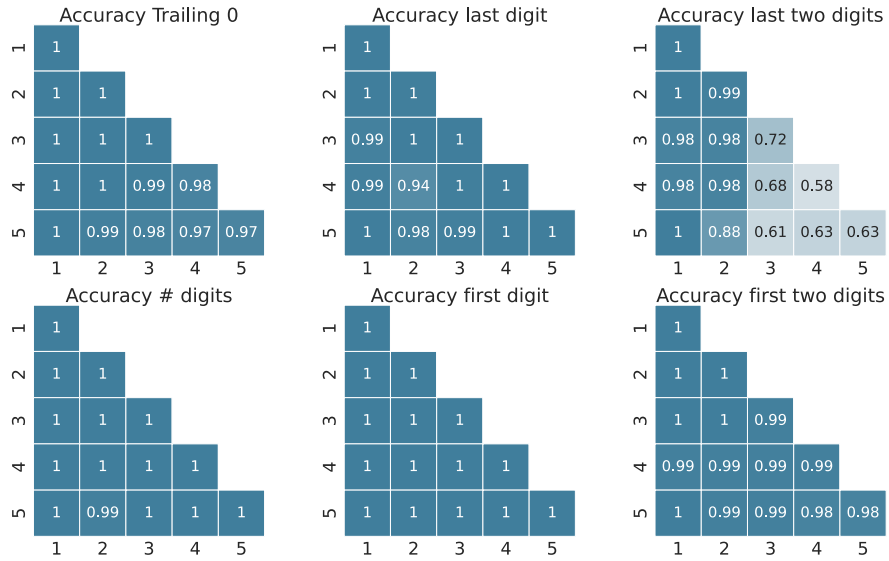

Figure 23: GPT4 zero-shot accuracy in predicting partially correct responses. This evidences surface pattern learning, since the accuracy of full answer prediction is significantly lower—and often near zero (see Figure 2). Specifically, ‘accuracy trailing zeros’ pertains to accurately predicting the number of zeros in the output number, which is known to be relatively easy to predict based on arithmetic calculations.

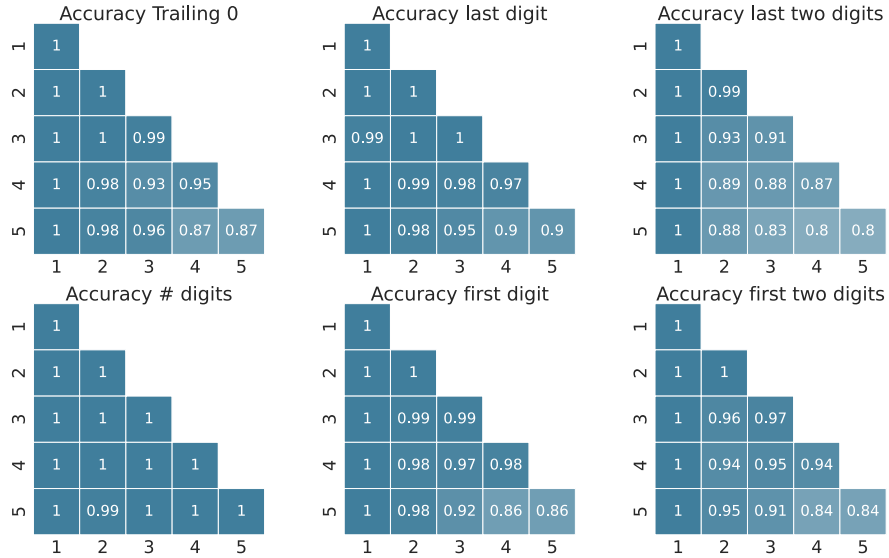

Figure 24: ChatGPT zero-shot accuracy in predicting partially correct responses. We observe the same trend for GPT3 predictions.

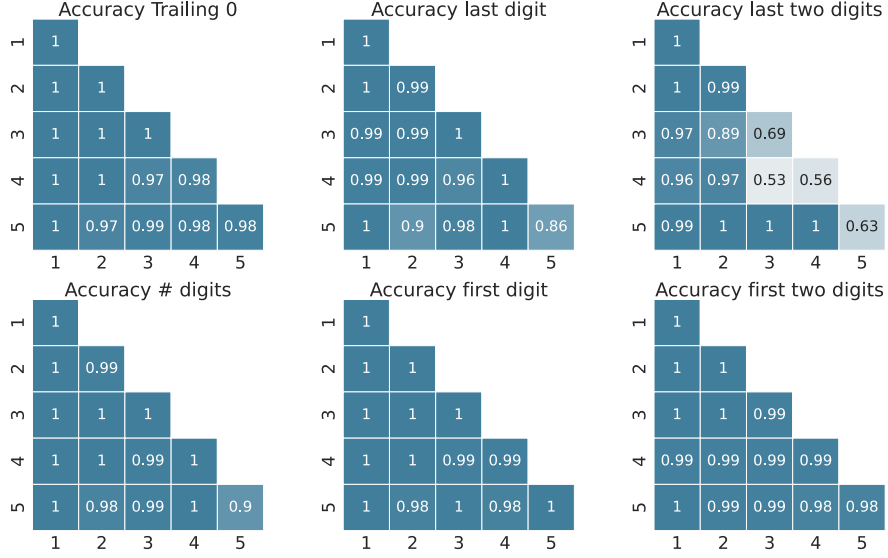

Figure 25: GPT4 five-shot accuracy in predicting partially correct responses. We observe the same trend for ChatGPT, GPT3 few-shot predictions.

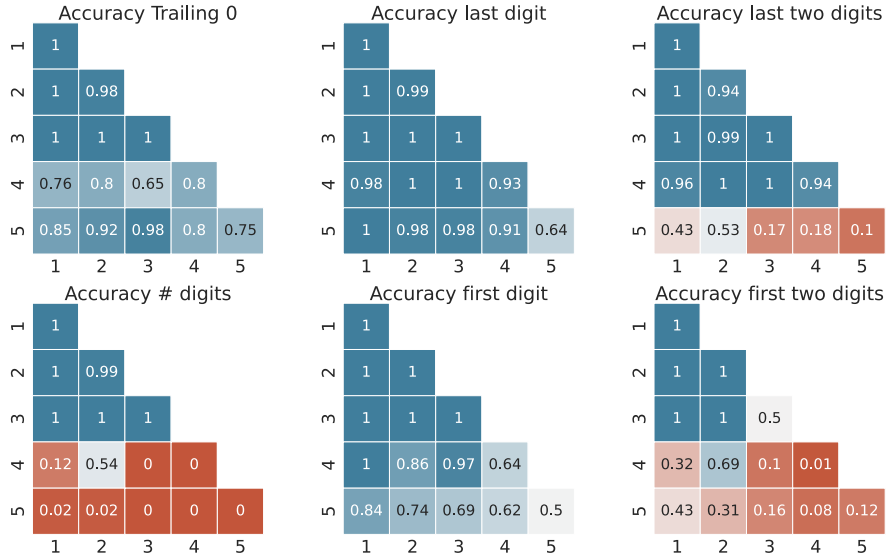

Figure 26: GPT3 finetuned on question-scratchpad pairs. Accuracy of predicting partially correct responses.

### 795 C.3 Relative Information Gain Predictions for Dynamic Programming Task

796 Let  $a_i$  be the  $i$ -th element of the input sequence, and let  $o_i$  be the  $i$ -th element of the output sequence.  
 797 As shown in Table 3,  $a_i$  is a good predictor of  $o_i$ , and this is especially true for  $a_1$  and  $a_{n-1}$ , the  
 798 first and last elements of the sequence. This matches the task intuition, since one would never pick  
 799 an element  $a_i < 0$  and decrease the final sum (one may pick  $a_i = 0$  if it makes a lexicographically  
 800 smaller output sequence).

801  $a_i$  weakly helps to predict its neighbors. The only case of this behavior with  $\text{RelativeIG} > 0.1$  is at  
 802 the start of the sequence, where the first element helps predict the value of the second. This again  
 803 matches intuition, since a very high  $a_1$  indicates that with high probability  $o_2$  will not be selected for  
 804 the final subsequence.

| Input variable | Output variable | Relative Information Gain for each problem size |      |      |      |      |      |      |      |      |
|----------------|-----------------|-------------------------------------------------|------|------|------|------|------|------|------|------|
|                |                 | 2                                               | 3    | 4    | 5    | 6    | 7    | 8    | 9    | 10   |
| $a_1$          | $o_2$           | 0.15                                            | 0.13 | 0.14 | 0.14 | 0.14 | 0.14 | 0.14 | 0.14 | 0.14 |
| $a_1$          | $o_1$           | 0.64                                            | 0.71 | 0.69 | 0.69 | 0.69 | 0.69 | 0.69 | 0.69 | 0.69 |
| $a_2$          | $o_2$           | 0.53                                            | 0.42 | 0.45 | 0.44 | 0.45 | 0.44 | 0.44 | 0.45 | 0.44 |
| $a_3$          | $o_3$           |                                                 | 0.64 | 0.49 | 0.53 | 0.52 | 0.52 | 0.52 | 0.52 | 0.52 |
| $a_4$          | $o_4$           |                                                 |      | 0.60 | 0.46 | 0.50 | 0.49 | 0.49 | 0.49 | 0.49 |
| $a_5$          | $o_5$           |                                                 |      |      | 0.62 | 0.47 | 0.51 | 0.50 | 0.50 | 0.50 |
| $a_6$          | $o_6$           |                                                 |      |      |      | 0.61 | 0.47 | 0.51 | 0.49 | 0.50 |
| $a_7$          | $o_7$           |                                                 |      |      |      |      | 0.61 | 0.47 | 0.51 | 0.50 |
| $a_8$          | $o_8$           |                                                 |      |      |      |      |      | 0.61 | 0.47 | 0.51 |
| $a_9$          | $o_9$           |                                                 |      |      |      |      |      |      | 0.61 | 0.47 |
| $a_{10}$       | $o_{10}$        |                                                 |      |      |      |      |      |      |      | 0.61 |
| $a_{n-1}$      | $o_{n-1}$       |                                                 | 0.64 | 0.60 | 0.62 | 0.61 | 0.61 | 0.61 | 0.61 | 0.61 |
| $a_{n-2}$      | $o_{n-2}$       |                                                 |      |      | 0.46 | 0.47 | 0.47 | 0.47 | 0.47 | 0.47 |
| $a_{n-3}$      | $o_{n-3}$       |                                                 |      |      |      |      | 0.51 | 0.51 | 0.51 | 0.51 |
| $a_{n-4}$      | $o_{n-4}$       |                                                 |      |      |      |      |      |      | 0.49 | 0.50 |

Table 3: **Highest Relative Information Gain Elements**, for DP problems of size  $2 \leq n \leq 10$ . We only show the (input, output) pairs where at least three problem sizes have RelativeIG>0, and at least one with RelativeIG>0.1.  $a_{n-1}$  refers to the last element of the sequence, regardless of its actual id in the sequence.

Similar behaviors, but with higher relative information gains overall, are observed when analyzing triples of consecutive elements in the list. Table 4 shows that  $o_i$  is highly predicted by  $(a_{i-1}, a_i, a_{i+1})$ . Moreover,  $o_i$  is highly predicted by both  $(a_{i-2}, a_{i-1}, a_i)$  and  $(a_i, a_{i+1}, a_{i+2})$ , with the former generally having higher scores than the latter. This again matches the task intuitions, since the value of the neighbors helps determine whether to select a number for the subsequence; and asking for the lexicographically smallest sequence biases the output subsequence to care more about the previous numbers rather than the following ones. We believe that this last point is the cause of the weakly predictive power of  $(a_{i-3}, a_{i-2}, a_{i-1})$  to predict  $o_i$ ; whereas  $(a_{i+1}, a_{i+2}, a_{i+3})$  is not shown, since all the relative information gain values were below 0.1.

|                           |                 | Relative Information Gain for each problem size |      |      |      |      |      |      |      |
|---------------------------|-----------------|-------------------------------------------------|------|------|------|------|------|------|------|
| Input variable            | Output variable | 3                                               | 4    | 5    | 6    | 7    | 8    | 9    | 10   |
| $a_{n-3} a_{n-2} a_{n-1}$ | $o_{n-1}$       |                                                 |      |      |      | 0.95 | 0.95 | 0.95 | 0.95 |
| $a_{n-3} a_{n-2} a_{n-1}$ | $o_{n-2}$       |                                                 |      |      |      | 0.87 | 0.87 | 0.87 | 0.87 |
| $a_{n-3} a_{n-2} a_{n-1}$ | $o_{n-3}$       |                                                 |      |      |      | 0.64 | 0.64 | 0.64 | 0.64 |
| $a_1 a_2 a_3$             | $o_1$           | 1.00                                            | 0.96 | 0.97 | 0.97 | 0.97 | 0.97 | 0.97 | 0.97 |
| $a_1 a_2 a_3$             | $o_2$           | 1.00                                            | 0.91 | 0.92 | 0.91 | 0.92 | 0.91 | 0.92 | 0.91 |
| $a_2 a_3 a_4$             | $o_2$           |                                                 | 0.56 | 0.55 | 0.55 | 0.55 | 0.55 | 0.55 | 0.56 |
| $a_1 a_2 a_3$             | $o_3$           | 1.00                                            | 0.66 | 0.73 | 0.71 | 0.72 | 0.72 | 0.72 | 0.72 |
| $a_2 a_3 a_4$             | $o_3$           |                                                 | 0.86 | 0.77 | 0.78 | 0.78 | 0.78 | 0.78 | 0.78 |
| $a_3 a_4 a_5$             | $o_3$           |                                                 |      | 0.67 | 0.66 | 0.66 | 0.66 | 0.66 | 0.66 |
| $a_2 a_3 a_4$             | $o_4$           |                                                 | 0.94 | 0.64 | 0.7  | 0.68 | 0.69 | 0.69 | 0.69 |
| $a_3 a_4 a_5$             | $o_4$           |                                                 |      | 0.88 | 0.79 | 0.81 | 0.8  | 0.8  | 0.8  |
| $a_4 a_5 a_6$             | $o_4$           |                                                 |      |      | 0.63 | 0.62 | 0.62 | 0.62 | 0.62 |
| $a_3 a_4 a_5$             | $o_5$           |                                                 |      | 0.95 | 0.65 | 0.71 | 0.69 | 0.7  | 0.7  |
| $a_4 a_5 a_6$             | $o_5$           |                                                 |      |      | 0.87 | 0.78 | 0.79 | 0.79 | 0.79 |
| $a_5 a_6 a_7$             | $o_5$           |                                                 |      |      |      | 0.64 | 0.63 | 0.63 | 0.64 |
| $a_4 a_5 a_6$             | $o_6$           |                                                 |      |      | 0.94 | 0.64 | 0.71 | 0.69 | 0.7  |
| $a_5 a_6 a_7$             | $o_6$           |                                                 |      |      |      | 0.87 | 0.78 | 0.8  | 0.8  |
| $a_6 a_7 a_8$             | $o_6$           |                                                 |      |      |      |      | 0.64 | 0.62 | 0.63 |
| $a_5 a_6 a_7$             | $o_7$           |                                                 |      |      |      | 0.95 | 0.64 | 0.71 | 0.69 |
| $a_6 a_7 a_8$             | $o_7$           |                                                 |      |      |      |      | 0.87 | 0.78 | 0.8  |
| $a_6 a_7 a_8$             | $o_8$           |                                                 |      |      |      |      | 0.95 | 0.64 | 0.71 |
| $a_1 a_2 a_3$             | $o_4$           |                                                 | 0.12 | 0.1  | 0.11 | 0.11 | 0.11 | 0.11 | 0.11 |
| $a_2 a_3 a_4$             | $o_5$           |                                                 |      | 0.1  | 0.09 | 0.1  | 0.09 | 0.1  | 0.1  |
| $a_3 a_4 a_5$             | $o_6$           |                                                 |      |      | 0.11 | 0.1  | 0.1  | 0.1  | 0.11 |
| $a_4 a_5 a_6$             | $o_7$           |                                                 |      |      |      | 0.11 | 0.09 | 0.1  | 0.11 |
| $a_5 a_6 a_7$             | $o_8$           |                                                 |      |      |      |      | 0.11 | 0.09 | 0.11 |

Table 4: **Highest Relative Information Gain Contiguous Triples**, for DP problems of size  $3 \leq n \leq 10$ . We only show the (input, output) pairs where at least three problem sizes have RelativeIG>0, and at least one with RelativeIG>0.1.  $a_{n-1}$  refers to the last element of the sequence, regardless of its actual id in the sequence.

#### 814 C.4 Empirical Surface Pattern Results for Dynamic Programming Task

815 We observe that all analyzed models match the Relative Information Gain prediction that  $o_1$  (whether  
816 the first element goes into the output sequence or not) should be the easiest value to predict (see  
817 Figures 27, 28, and 29). However, since GPT3 often predicts shorter output sequences than the  
818 required size, the analysis of the predictive power of  $o_{n-1}$  is only done for GPT4. In GPT4, we  
819 observe that  $o_{n-1}$  is among the easiest values to predict as expected by Relative Information Gain.

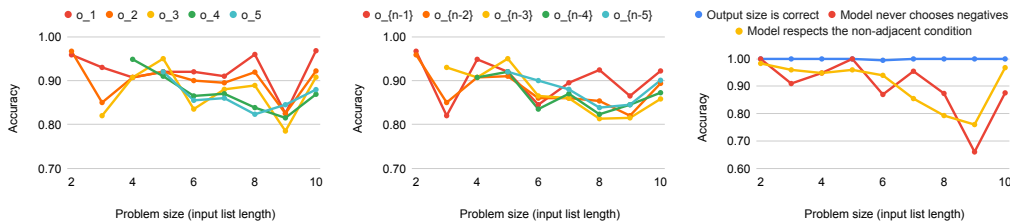

Figure 27: GPT4 five-shot with scratchpad accuracy in predicting output elements  $o_i$  in the DP task. All  $o_i$  are predicted with high accuracy with  $o_1$  and  $o_{n-1}$  being consistently among the highest. These observations go in line with the Relative Information Gain prediction.

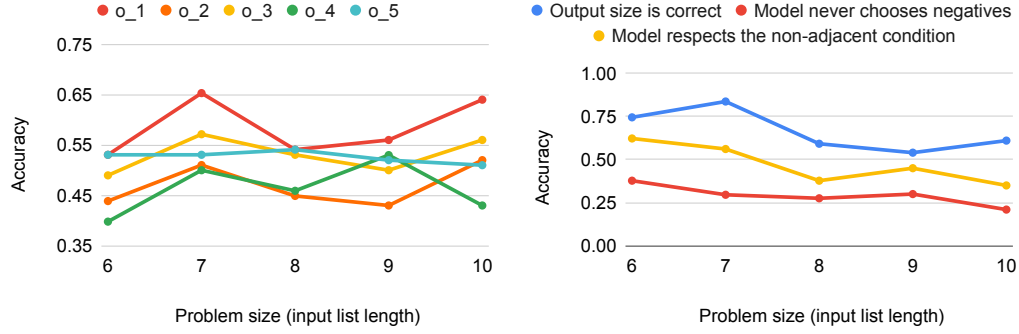

Figure 28: GPT3 few-shot without scratchpad accuracy in predicting output elements  $o_i$  in the DP task. As predicted by Relative Information Gain, the model predicts  $o_1$  correctly with the highest probability. However, because GPT3 often does not produce the correct output size, it hinders us from analyzing  $o_{n-1}$ .

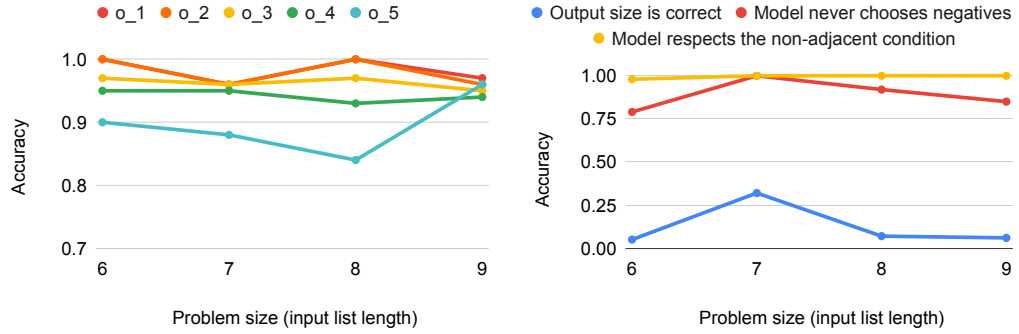

Figure 29: GPT3 fine-tuned without scratchpad accuracy in predicting output elements  $o_i$  in the DP task. As predicted by Relative Information Gain, the model predicts  $o_1$  correctly with the highest probability. However, because GPT3 often does not produce the correct output size, it hinders us from analyzing  $o_{n-1}$ .



## 821 D Derivations

### 822 D.1 Transformers struggle with problems with increasingly larger parallelism (*width*)

823 **Proposition D.1.** Let  $f_n(\mathbf{x}) = h_n(g(\mathbf{x}, 1), g(\mathbf{x}, 2), \dots, g(\mathbf{x}, n))$ . Let  $\hat{h}_n, \hat{g}, \hat{f}_n$  be estimators of  
 824  $h_n, g, f_n$  respectively. Assume  $\mathbb{P}(h_n = \hat{h}_n) = 1$  and  $\mathbb{P}(h_n(X) = h_n(Y) \mid X \neq Y) < \beta\alpha^n$   
 825 for some  $\alpha \in (0, 1)$  and  $\beta > 0$  (i.e.  $\hat{h}_n$  perfectly estimates  $h_n$ , and  $h_n$  is almost injective). If  
 826  $\mathbb{P}(g \neq \hat{g}) = \epsilon > 0$  and errors in  $\hat{g}$  are independent, then  $\lim_{n \rightarrow +\infty} \mathbb{P}(f_n \neq \hat{f}_n) = 1$ .

827 *Proof.* For ease of writing, let  $X_i = g(X, i)$  and  $Y_i = \hat{g}(X, i)$ , and let  $\mathbf{X} = (X_1, \dots, X_n)$  and  
 828  $\mathbf{Y} = (Y_1, \dots, Y_n)$ . We will compute some auxiliary probabilities, and then upper bound  $\mathbb{P}(f = \hat{f})$ ,  
 829 to finally compute its limit.

$$\begin{aligned} \mathbb{P}(\mathbf{X} = \mathbf{Y}) &= \mathbb{P}(X_1 = Y_1, X_2 = Y_2, \dots, X_n = Y_n) \\ &= \mathbb{P}(X_1 = Y_1) \cdot \mathbb{P}(X_2 = Y_2) \dots \mathbb{P}(X_n = Y_n) = \mathbb{P}(g = \hat{g})^n = (1 - \epsilon)^n \end{aligned} \quad (2)$$

830 Since by hypothesis we know  $\mathbb{P}(h_n(\mathbf{Y}) = \hat{h}_n(\mathbf{Y})) = 1$ , we have that:

$$\begin{aligned} \mathbb{P}(h_n(\mathbf{X}) = \hat{h}_n(\mathbf{Y}) \mid \mathbf{X} \neq \mathbf{Y}) &= \mathbb{P}(h_n(\mathbf{X}) = \hat{h}_n(\mathbf{Y}) \cap h_n(\mathbf{Y}) = \hat{h}_n(\mathbf{Y}) \mid \mathbf{X} \neq \mathbf{Y}) \\ &= \mathbb{P}(h_n(\mathbf{X}) = h_n(\mathbf{Y}) = \hat{h}_n(\mathbf{Y}) \mid \mathbf{X} \neq \mathbf{Y}) \\ &\leq \mathbb{P}(h_n(\mathbf{X}) = h_n(\mathbf{Y}) \mid \mathbf{X} \neq \mathbf{Y}) \\ &< \beta\alpha^n \end{aligned} \quad (3)$$

831 We will now estimate  $\mathbb{P}(f_n = \hat{f}_n)$  using the law of total probability w.r.t. the event  $\mathbf{X} = \mathbf{Y}$ .

$$\begin{aligned} \mathbb{P}(f_n = \hat{f}_n) &= \mathbb{P}(h_n(\mathbf{X}) = \hat{h}_n(\mathbf{Y})) \\ &= \mathbb{P}(h_n(\mathbf{X}) = \hat{h}_n(\mathbf{Y}) \mid \mathbf{X} = \mathbf{Y}) \cdot \mathbb{P}(\mathbf{X} = \mathbf{Y}) + \mathbb{P}(h_n(\mathbf{X}) = \hat{h}_n(\mathbf{Y}) \mid \mathbf{X} \neq \mathbf{Y}) \cdot \mathbb{P}(\mathbf{X} \neq \mathbf{Y}) \\ &= \mathbb{P}(h_n(\mathbf{X}) = \hat{h}_n(\mathbf{X})) \cdot \mathbb{P}(\mathbf{X} = \mathbf{Y}) + \mathbb{P}(h_n(\mathbf{X}) = \hat{h}_n(\mathbf{Y}) \mid \mathbf{X} \neq \mathbf{Y}) \cdot (1 - \mathbb{P}(\mathbf{X} = \mathbf{Y})) \\ &= 1 \cdot (1 - \epsilon)^n + \mathbb{P}(h_n(\mathbf{X}) = \hat{h}_n(\mathbf{Y}) \mid \mathbf{X} \neq \mathbf{Y}) \cdot (1 - (1 - \epsilon)^n) \quad (\text{using [2] and hypothesis}) \\ &< (1 - \epsilon)^n + \beta\alpha^n \cdot (1 - (1 - \epsilon)^n) \quad (\text{using [3]}) \\ &< \beta\alpha^n + (1 - \epsilon)^n \cdot (1 - \beta\alpha^n) \end{aligned}$$

832 To conclude our proof, we will show that  $\lim_{n \rightarrow +\infty} \mathbb{P}(f_n = \hat{f}_n)$  exists and compute its value. Note that  
 833 since  $1 - \epsilon \in [0, 1)$  and  $\alpha \in (0, 1)$ , trivially  $\lim_{n \rightarrow +\infty} \beta\alpha^n + (1 - \epsilon)^n \cdot (1 - \beta\alpha^n) = 0$ .

$$0 \leq \liminf_{n \rightarrow +\infty} \mathbb{P}(f_n = \hat{f}_n) \leq \limsup_{n \rightarrow +\infty} \mathbb{P}(f_n = \hat{f}_n) \leq \limsup_{n \rightarrow +\infty} \beta\alpha^n + (1 - \epsilon)^n \cdot (1 - \beta\alpha^n) = 0$$

834 Then,  $\lim_{n \rightarrow +\infty} \mathbb{P}(f_n = \hat{f}_n) = 0$  and we conclude  $\lim_{n \rightarrow +\infty} \mathbb{P}(f_n \neq \hat{f}_n) = 1$ .  $\square$

835 **Corollary D.1.** Assume that a model  $\mathcal{M}$  solves shifted addition perfectly, but it incorrectly solves **at**  
 836 **least one**  $m$  digit by 1 digit multiplication for some fixed  $m$ . Then, the probability that  $\mathcal{M}$  will solve  
 837 **any**  $m$  digit by  $n$  digit multiplication using the long-form multiplication algorithm tends to 0.

838 *Proof.* We define  $s : \mathbb{Z}_{10}^{m+n} \times \mathbb{N} \rightarrow \mathbb{N} \times \mathbb{N}$ ,  $d : \mathbb{N} \times \mathbb{Z}_{10} \rightarrow \mathbb{N}$ ,  $h_n : \mathbb{N}^n \rightarrow \mathbb{N}$ , and  $f_n : \mathbb{Z}_{10}^{m+n} \rightarrow \mathbb{N}$   
 839 as follows.

$$\begin{aligned} s([x_1, \dots, x_m, x_{m+1}, \dots, x_{m+n}], j) &:= (x_1 \frown x_2 \dots \frown x_m, x_{m+j}) \\ &\quad \text{where } x_1 \frown x_2 \dots \frown x_m \text{ denotes concatenating digits } x_i \\ d(x, y) &:= x \cdot y \\ g &:= d \circ s \\ h_n(x_1, \dots, x_n) &:= \sum_{i=1}^n x_i 10^{n-i} \\ f_n(\mathbf{x}) &:= h_n(g(\mathbf{x}, 1), g(\mathbf{x}, 2), \dots, g(\mathbf{x}, n)) \end{aligned}$$

840 Note that  $g$  defines the base-10 multiplication between  $m$ -digit numbers  $(x_1x_2 \dots x_m)$  and 1-digit  
841 numbers  $(x_{m+j})$ , where  $s$  denotes the selection of the numbers to multiply and  $d$  denotes the actual  
842 multiplication. Note that  $h_n$  describes the shifted addition used at the end of long-form multiplication  
843 to combine  $n$   $m$ -digit by 1-digit multiplications. Therefore,  $f_n$  describes the long-form multiplication  
844 of  $m$ -digit by  $n$ -digit numbers.

845 By hypothesis,  $\mathbb{P}(g \neq \hat{g}) = \epsilon > 0$  and  $\mathbb{P}(h_n = \hat{h}_n) = 1$ , where  $\hat{g}$  and  $\hat{h}_n$  denote estimators using  
846 model  $\mathcal{M}$ . It can be shown that  $\mathbb{P}(h_n(X) = h_n(Y) \mid X \neq Y) < \beta\alpha^n$  for  $\alpha = 0.1$  and  $\beta = 10^m$ .  
847 Using Lemma [D.1](#),  $\lim_{n \rightarrow +\infty} \mathbb{P}(f_n \neq \hat{f}_n) = 1$ , which concludes our proof.

848 □

849 Note that Lemma [D.1](#)'s proofs gives us empirical bounds once  $\epsilon$  and  $\alpha$  are approximated. Also  
850 **note that our definition of  $g$  in the proof of Corollary [D.1](#) highlights two possible sources of**  
851 **exponentially-accumulating error:** errors in the selection of the numbers to multiply  $s$ , and errors  
852 in the actual  $m$ -digit by 1-digit multiplication  $d$ .

## 853 **D.2 Transformers struggle with problems that require increasingly larger iterative** 854 **applications of a function (depth)**

855 **Proposition D.2.** *Let  $f_n(\mathbf{x}) = g^n(\mathbf{x})$ . Assume  $\mathbb{P}(g(X) = \hat{g}(Y) \mid X \neq Y) \leq c$  (i.e. recovering from*  
856 *a mistake due to the randomness of applying the estimator on an incorrect input has probability at*  
857 *most  $c$ ). If  $\mathbb{P}(g \neq \hat{g}) = \epsilon > 0$  with  $c + \epsilon < 1$ , then  $\liminf_{n \rightarrow +\infty} \mathbb{P}(f_n \neq \hat{f}_n) = 1 - \frac{c}{c + \epsilon}$ .*

858 *Proof.* We first derive a recursive upper bound using the law of total probability, and then prove a  
859 non-recursive upper bound by induction.

$$\begin{aligned} s_n &:= \mathbb{P}(f_n = \hat{f}_n) = \mathbb{P}(g(g^{n-1}(Z)) = \hat{g}(\hat{g}^{n-1}(Z))) \\ &= \mathbb{P}(g(\mathbf{X}) = \hat{g}(\mathbf{Y})) \quad \text{where } \mathbf{X} := g^{n-1}(Z) \text{ and } \mathbf{Y} := \hat{g}^{n-1}(Z) \\ &= \mathbb{P}(g(\mathbf{X}) = \hat{g}(\mathbf{Y}) \mid \mathbf{X} = \mathbf{Y}) \cdot \mathbb{P}(\mathbf{X} = \mathbf{Y}) + \mathbb{P}(g(\mathbf{X}) = \hat{g}(\mathbf{Y}) \mid \mathbf{X} \neq \mathbf{Y}) \cdot \mathbb{P}(\mathbf{X} \neq \mathbf{Y}) \\ &= \mathbb{P}(g(\mathbf{X}) = \hat{g}(\mathbf{X})) \cdot \mathbb{P}(\mathbf{X} = \mathbf{Y}) + \mathbb{P}(g(\mathbf{X}) = \hat{g}(\mathbf{Y}) \mid \mathbf{X} \neq \mathbf{Y}) \cdot (1 - \mathbb{P}(\mathbf{X} = \mathbf{Y})) \\ &= \mathbb{P}(g(\mathbf{X}) = \hat{g}(\mathbf{X})) \cdot s_{n-1} + \mathbb{P}(g(\mathbf{X}) = \hat{g}(\mathbf{Y}) \mid \mathbf{X} \neq \mathbf{Y}) \cdot (1 - s_{n-1}) \\ &\leq (1 - \epsilon) \cdot s_{n-1} + c \cdot (1 - s_{n-1}) \\ &\leq (1 - \epsilon - c) \cdot s_{n-1} + c \end{aligned}$$

860 We know  $s_1 = (1 - \epsilon)$  since  $s_1 = \mathbb{P}(f_1 = \hat{f}_1) = \mathbb{P}(g = \hat{g})$ . Let  $b := 1 - \epsilon - c$  for ease of writing.  
861 Then, we have

$$s_n \leq b \cdot s_{n-1} + c \tag{4}$$

862 It can be easily shown by induction that  $s_n \leq b^{n-1}(1 - \epsilon) + c \sum_{i=0}^{n-2} b^i$ :

863 • The **base case**  $n = 2$  is true since we know  $s_2 \leq b \cdot s_1 + c$ , and  $b \cdot s_1 + c = b(1 - \epsilon) + c =$   
864  $b^{2-1}(1 - \epsilon) + c \sum_{i=0}^{2-2} b^i$ , thus showing  $s_2 \leq b^{2-1}(1 - \epsilon) + c \sum_{i=0}^{2-2} b^i$

865 • The **inductive step** yields directly using Equation [4](#),

$$\begin{aligned} s_n &\leq b \cdot s_{n-1} + c \\ &\leq b \cdot \left( b^{n-2}(1 - \epsilon) + c \sum_{i=0}^{n-3} b^i \right) + c \leq b^{n-1}(1 - \epsilon) + c \sum_{i=1}^{n-2} b^i + c \leq b^{n-1}(1 - \epsilon) + c \sum_{i=0}^{n-2} b^i \end{aligned}$$

866 We can rewrite the geometric series  $\sum_{i=0}^{n-2} b^i$  in its closed form  $\frac{1-b^{n-1}}{1-b}$ , and recalling  $b := 1 - \epsilon - c$ ,

$$\begin{aligned} s_n &\leq b^{n-1}(1 - \epsilon) + c \frac{1 - b^{n-1}}{1 - b} = b^{n-1}(1 - \epsilon) + c \frac{1 - b^{n-1}}{c + \epsilon} \\ &= b^{n-1}(1 - \epsilon) + \frac{c}{c + \epsilon} - b^{n-1} \frac{c}{c + \epsilon} \\ &= b^{n-1} \left( 1 - \epsilon - \frac{c}{c + \epsilon} \right) + \frac{c}{c + \epsilon} \end{aligned}$$

867 Recalling that  $s_n = \mathbb{P}(f_n = \hat{f}_n)$ , we compute the limit inferior of  $\mathbb{P}(f_n \neq \hat{f}_n) = 1 - s_n \geq$   
868  $1 - b^{n-1}(1 - \epsilon - \frac{c}{c+\epsilon}) - \frac{c}{c+\epsilon}$ .

$$\liminf_{n \rightarrow +\infty} \mathbb{P}(f_n \neq \hat{f}_n) \geq \lim_{n \rightarrow +\infty} 1 - b^{n-1} \left( 1 - \epsilon - \frac{c}{c+\epsilon} \right) - \frac{c}{c+\epsilon} = 1 - \frac{c}{c+\epsilon}$$

869 that concludes our proof.  $\square$

870 We can generalize the proof in Lemma 4.2 to tasks where there are potentially many valid reasoning  
871 chains with the following alternative state-transition framing.

872 **Lemma D.2.** *Let  $S$  denote the set of all possible states a language model can generate, and let*  
873  *$z : S \rightarrow \{0, 1\}$  defines if a state is valid (0 = invalid). Let  $\hat{g} : S \rightarrow \Pi(S)$  be a state-transition*  
874 *function representing a language model's probability distribution of generating each possible next*  
875 *state when attempting to perform a single reasoning step. Assume  $\mathbb{P}(z(\hat{g}(X)) = 1 \mid z(X) = 0) \leq c$*   
876 *and  $\mathbb{P}(z(\hat{g}(X)) = 0 \mid z(X) = 1) = \epsilon > 0$  with  $c + \epsilon < 1$ . Then,  $\liminf_{n \rightarrow +\infty} \mathbb{P}(z(\hat{g}^n) = 0) = 1 - \frac{c}{c+\epsilon}$ .*

877 If for task  $T$  we know that all valid reasoning chains to arrive at a correct result have at least length  
878  $n$  (i.e., the equivalent of defining  $f_n = g^n$  in Lemma D.1) then the probability of solving task  $T$   
879 correctly tends to at most  $\frac{c}{c+\epsilon}$ .

880 **Corollary D.3.** *The recursions for dynamic programming tasks, the  $m$ -by-1 digit multiplication, and*  
881 *the puzzle's elimination function are all tasks where there is a fixed reasoning step  $g$  being repeatedly*  
882 *applied. Therefore, we can directly apply Proposition 4.2 to these tasks.*

883 *Proof.* Let's analyze the three tasks separately below.

884  **$m$ -by-1 digit multiplication may be viewed as  $f^m(\mathbf{x})$**  Let  $x = (x_1, \dots, x_m)$  be the  $m$ -digit  
885 number that we multiply by the 1-digit number  $y$  ( $0 \leq y < 10$ ). Let  $z = (z_1, \dots, z_{m+1})$  denote  
886  $z = x \cdot y$ , which is guaranteed to have exactly  $m + 1$  digits (with possibly leading zeros). We define  
887  $f$  as:

$$f(x_1, \dots, x_m, y, i, c) := (x_1, \dots, x_{i-1}, x'_i, x_{i+1}, \dots, x_m, y, i-1, c')$$

888 where  $x'_i := (x_i \cdot y + c) \bmod 10$  and  $c' := \lfloor (x_i \cdot y + c) / 10 \rfloor$ . Note that  $x'_i = z_{i+1}$  since  $f$  is  
889 performing one step of the long-form multiplication algorithm.

890 Let the initial input be  $\mathbf{x} := (x_1, \dots, x_m, y, m, 0)$ . Then, it can be easily shown that  
891  $f^m(\mathbf{x}) = (z_2, \dots, z_{m+1}, y, 0, c)$ . Since  $c$  is the left-most carry, it is the leading digit  
892 of  $z$ , i.e.  $c = z_1$  (possibly zero). Thus, the value of  $z$  can be directly extracted from  
893  $f^m(\mathbf{x}) = (z_2, \dots, z_{m+1}, y, 0, z_1)$ .

894 **In the DP task,  $dp$ 's computation may be viewed as  $f^{m-2}(x)$  for a list of size  $m$**  See §A.3.1  
895 for details on the solution to this problem. We will use identical notation. Let  $a_1, \dots, a_m$   
896 be an input list. Let  $\mathbf{x} = (a_1, \dots, a_{m-2}, a'_{m-1}, a'_m, m-2)$ , where  $a'_m := \max(a_m, 0)$  and  
897  $a'_{m-1} := \max(a_{m-1}, a_m, 0)$ . Intuitively, this means that we have applied the first two steps of  
898 the  $dp$  computation, and stored the results in  $a'_{m-1}$  and  $a'_m$ . Let  $f$  be a function representing the  
899 recursive computation of  $dp_i$ :

$$f(a_1, \dots, a_i, a'_{i+1}, \dots, a'_m, i) = (a_1, \dots, a_{i-1}, a'_i, \dots, a'_m, i-1)$$

900 where  $a'_i := \max(a'_{i+1}, a_i + a'_{i+2}, 0)$ .

901 Note that since  $a'_{i+1}$  stores the value of  $dp_{i+1}$  and  $a'_{i+2}$  stores the value of  $dp_{i+2}$ , it can be easily  
902 shown that  $f^{m-2}(\mathbf{x}) = (a'_1, \dots, a'_m, 0) = (dp_1, \dots, dp_m, 0)$ . Therefore,  $f^{m-2}$  computes all  
903 recursive values of  $dp_i$  when given the base cases.

904 **In the DP task, the reconstruction of the desired subsequence given already computed  $dp$  values**  
905 **may be viewed as  $f^m(x)$  for an input list of size  $m$ .** This case is similar to the previous one. Let  
906  $r = (r_1, \dots, r_m)$  be the result, where  $r_i = 1$  if  $a_i$  was selected for the desired subsequence, and  
907  $r_i = 2$  otherwise. Let  $\mathbf{x} := (dp_1, \dots, dp_m, 0, 0, a_1, \dots, a_m, 1, 1)$ . Let  $f$  be defined as follows:

$$f(dp_1, \dots, dp_m, 0, 0, a'_1, \dots, a'_{i-1}, a_i, \dots, a_m, i, u) = (dp_1, \dots, dp_m, 0, 0, a'_1, \dots, a'_i, a_{i+1}, \dots, a_m, i+1, u')$$

908 where  $a'_i := 2 - \mathbb{1}\{dp_i = a_i + dp_{i+2} \text{ and } u = 1\}$  and  $u := 1 - \mathbb{1}\{dp_i = a_i + dp_{i+2} \text{ and } u = 1\}$ .  
 909 Intuitively,  $a'_i$  stores whether the  $i$ -th element of the list should be selected for the final subsequence,  
 910 assigning 1 if the element should be taken, and 2 otherwise (i.e.,  $a'_i = r_i$ ). Moreover, if the  $i$ -th  
 911 element has been selected, we mark that the next item will not be available using  $u'$ . Therefore,  $f$   
 912 performs one step of the final output reconstruction as defined in §A.3.1.

913 It can be easily shown that  $f^m(\mathbf{x}) := (dp_1, \dots, dp_m, 0, 0, a'_1, \dots, a'_m, m+1, u') =$   
 914  $(dp_1, \dots, dp_m, 0, 0, r_1, \dots, r_m, m+1, u')$ . Note that the extra two elements in the input state  
 915 allow lifting the special cases  $m-1$  and  $m$  in the solution shown in §A.3.1 without falling out of  
 916 bounds.

917 **Solving the puzzle task may be seen as  $f^m$  for some  $m$ , where  $f$  is the elimination function** Let  
 918  $c_1, \dots, c_n$  be the list of clues, let  $H$  be the number of houses, and let  $A$  be a partially filled solution  
 919 of size  $K \times M$  as defined in §2.4. Each cell  $A_{ij}$  can take  $H+1$  values: the  $H$  options for the cell  
 920 and the value  $\emptyset$ , implying this cell has not been filled. An elimination step  $f$  may be defined as:

$$f(c_1, \dots, c_n, A_{11}, \dots, A_{1M}, \dots, A_{K1}, \dots, A_{KM}) = (c_1, \dots, c_n, A'_{11}, \dots, A'_{1M}, \dots, A'_{K1}, \dots, A'_{KM})$$

921 where  $A'$  is also a partially filled matrix, with  $A_{ij} = A'_{ij}$  for every  $A_{ij} \neq \emptyset$  and where  $A'$  has at least  
 922 one more filled cell.

923 Let  $\mathbf{x} = (c_1, \dots, c_n, E)$  where  $E$  is an empty matrix of size  $K \times M$  (all cell values of  $E$  are  $\emptyset$ ).

924 Then, a full solution is computed as  $f^m(\mathbf{x})$  for some value of  $m$  that increases with the problem size.  
 925 In contrast to other tasks, the value of  $m$  is not fixed, and depends on the task instance, but using  
 926 solvers we know that  $m$  increases with problem size.  $\square$

### 927 D.3 Discussing $c \ll \epsilon$ in the context of Proposition 4.2

928 Note that in Proposition 4.2, if  $c \ll \epsilon$  then  $\liminf_{n \rightarrow +\infty} \mathbb{P}(f_n \neq \hat{f}_n) \approx 1$ . This is because assuming

929  $\epsilon = m \cdot c$  for some  $m > 0$ , we have  $1 - \frac{c}{c + \epsilon} = 1 - \frac{c}{c + m \cdot c} = 1 - \frac{1}{m+1} = \frac{m}{m+1}$ , and  
 930  $\frac{m}{m+1}$  is a monotonically increasing function for all  $m > 0$  that tends to 1 when  $m$  goes to infinity.

931 Therefore, large  $m$ 's (or alternatively,  $c \ll \epsilon$ ) imply  $\frac{m}{m+1}$  will be close to 1.

932 It is reasonable to assume  $c \ll \epsilon$  when  $g$  has low collision, since  $c$  represents the probability of the  
 933 estimator  $\hat{g}(y)$  arriving at the correct output  $g(x)$  by chance when given the wrong input  $y \neq x$ .

934 If  $g$  is discrete, it can take  $|\text{Im}(g)|$  values, where  $|\text{Im}(g)|$  denotes the cardinal of the image space of  
 935  $g$ . Assuming approximately uniform errors,  $c \approx \epsilon/|\text{Im}(g)|$ , which in turn implies  $c \ll \epsilon$  since  $g$  being  
 936 low collision implies  $|\text{Im}(g)|$  is large.

937 If  $g$  is continuous, then assuming approximately uniform errors we have  $c \approx 0$ .

938 Summarizing both cases, if errors are approximately evenly distributed we obtain that  
 939  $\liminf_{n \rightarrow +\infty} \mathbb{P}(f_n \neq \hat{f}_n) \approx 1$ .

940 **D.4 Error rates in repeated applications of a function may be unbounded**

941 Time series analysis studies series  $(y_t)_t$  where each  $y_t$  linearly depends on the immediately previous  
 942  $p \geq 1$  time steps, and potentially including an error component. We will focus on the vectorial case,  
 943 defined as follows.

**Definition D.1** (Hamilton 1994,  $p$ -th order vector autoregressions, VAR( $p$ )). *Let*

$$y_t = c + \Phi_1 y_{t-1} + \Phi_2 y_{t-2} + \dots + \Phi_p y_{t-p} + \epsilon_t$$

944 *where  $c$  denotes a  $n \times 1$  vector of constants and  $\Phi_i$  denotes an  $n \times n$  matrix of autoregressive*  
 945 *coefficients. The  $n \times 1$   $\epsilon_t$  vector is a generalization of white noise:  $E(\epsilon_t) = 0$ ,  $E(\epsilon_t, \epsilon'_\Gamma) = 0$  for*  
 946  *$t \neq \Gamma$ , and  $E(\epsilon_t, \epsilon_t) = \Omega$  with  $\Omega$  symmetric positive definite matrix.*

947

948 We say a process is covariance-stationary if its first and second moments ( $E[y_t]$  and  $E[y'_t y'_{t-j}]$ ) are  
 949 independent of the time  $t$ . Intuitively, this implies that the consequences of any  $\epsilon_t$  must eventually  
 950 die out. Such a process may also be referred to as a *stable process* (e.g., in Lütkepohl 2005). The  
 951 following necessary and sufficient condition for stableness can be derived:

**Proposition D.3** (Hamilton 1994, Proposition 10.1). *Let  $F$  be an  $np \times np$  matrix defined as follows.*

$$F = \begin{bmatrix} \Phi_1 & \Phi_2 & \Phi_3 & \dots & \Phi_{p-1} & \Phi_p \\ I_n & 0 & 0 & \dots & 0 & 0 \\ 0 & I_n & 0 & \dots & 0 & 0 \\ 0 & 0 & I_n & \dots & 0 & 0 \\ 0 & 0 & 0 & \dots & I_n & 0 \end{bmatrix}$$

*The eigenvalues of matrix  $F$  satisfy*

$$|I_n \lambda^p - \Phi_1 \lambda^{p-1} - \Phi_2 \lambda^{p-2} - \dots - \Phi_p| = 0$$

952 *Hence, a VAR( $p$ ) is covariance-stationary as long as  $|\lambda| < 1$  for all values of  $\lambda$  satisfying this*  
 953 *equation.*

954 In our case, repeated iterations only involve considering the immediately previous step, i.e.  $p = 1$ .  
 955 Then, a VAR(1) process  $y_t = c + \Phi_1 y_{t-1} + \epsilon_t$  is covariance-stationary (or stable) if and only if the  
 956 eigenvalues of  $F = \Phi_1$  lie inside the unit circle.  $F$  will be unstable if at least one eigenvalue lies  
 957 outside the unit circle, which in turn usually means an explosive system.

**Intuition** For VAR(1) (i.e.,  $y_t = c + \Phi_1 y_{t-1} + \epsilon_t$ ), we can intuitively see why large eigenvalues  
 are problematic. If  $y_t$  is VAR(1), then it can be rewritten as

$$y_t = \Phi_1^t y_0 + \sum_{i=1}^{t-1} \Phi_1^i \epsilon_{t-i} + \left( I_n + \sum_{i=0}^{t-1} \Phi_1^i \right) c$$

958 Intuitively, large eigenvalues are problematic because if we diagonalize  $\Phi_1 = PDP^{-1}$ , then  
 959  $\Phi_1^t = PD^t P^{-1}$ , with  $D_{ii} = \lambda_i^t$ . Thus, a component of  $\Phi_1^t$  will diverge if  $|\lambda_i| > 1$ . If  $\Phi_1$  is  
 960 not diagonalizable, a similar argument holds for its Jordan decomposition. See Lütkepohl 2005,  
 961 Section 2.1.1 for details.

## 962 **E Societal impact**

963 Our work on analyzing the limitations of current Transformers in compositional tasks can have a  
964 positive societal impact in several ways. By shedding light on these limitations, we contribute to a  
965 deeper understanding of the capabilities and constraints of these models. This knowledge is essential  
966 for researchers, developers, and policymakers in making informed decisions regarding the application  
967 of Transformers in various domains.

968 Understanding the limitations of Transformers in compositional reasoning is crucial for developing  
969 more reliable and robust AI systems. By identifying these shortcomings, we can direct future research  
970 efforts toward addressing these limitations and developing models that exhibit improved performance  
971 in handling complex tasks requiring compositional reasoning.

972 We do not foresee any negative societal impacts, as our analysis aims to understand the reasons  
973 behind transformers' failures and successes, but does not introduce any new model or dataset that  
974 future work may leverage.
